# Supplementary material for: 8DSS-promoted remineralization of demineralized dentin in vitro
Source: Royal Society of Chemistry journal article supplement (doi:10.1039/c5tb00764j), 2015-01-01
Supplement: c5tb00764j1.pdf [file c5tb00764j1.pdf]

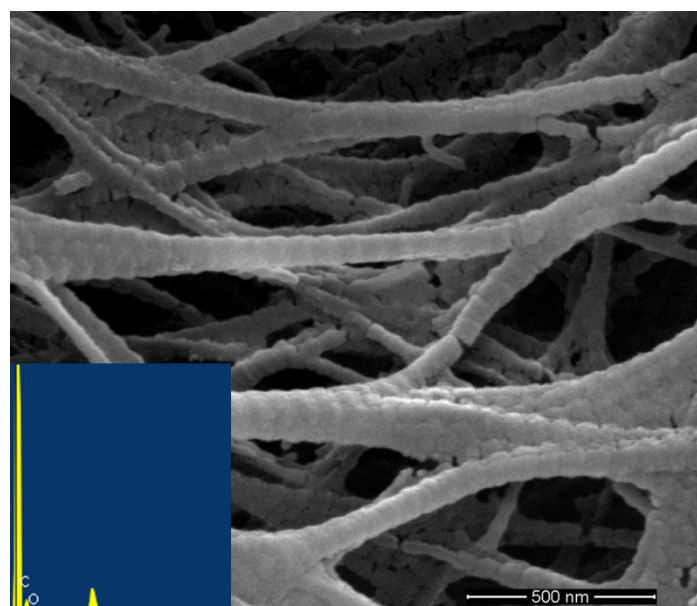

Figure S1. SEM image of the dentin surface after being demineralized with 37% phosphoric acid for 2 min. Energy disperse spectrum (EDS) (Insets) showed that there were no Ca and P elements on the demineralized surface.
